# Supplementary material
Source: PubMed Central journal article supplement (PMC7254527)
Supplement: ao0c00559_si_001.pdf [file ao0c00559_si_001.pdf]

## SUPPORTING INFORMATION

### **Design of dual inhibitors of Histone Deacetylase 6 (HDAC6) and Heat Shock Protein 90 (Hsp90)**

Luca Pinzi,<sup>a†</sup> Rosaria Benedetti,<sup>a‡</sup> Lucia Altucci,<sup>‡</sup> Giulio Rastelli<sup>†\*</sup>

<sup>†</sup>Department of Life Sciences, University of Modena and Reggio Emilia. Via G. Campi 103, 41125 Modena, Italy.

<sup>‡</sup>Department of Precision Medicine, University of Campania "*Luigi Vanvitelli*". Via L. De Crecchio 7, 80138 Naples, Italy.

\* Correspondence to Prof. Giulio Rastelli, Department of Life Sciences, University of Modena and Reggio Emilia. Via Giuseppe Campi, 103. 41125 - Modena, Italy. Phone: +39 035 2058564; e-mail: giulio.rastelli@unimore.it

## TABLE OF CONTENT

|               |    |
|---------------|----|
| Table S1..... | S3 |
| Table S2..... | S4 |

**Table S1. Representative HDAC6 and Hsp90 crystal structures employed in the study.**

| <i>Protein</i> | <i>Cluster ID</i> | <i>Number of the waters</i> | <i>PDB code</i> | <i>Chain</i> | <i>Ligand ID</i> | <i>Resolution (Å)</i> | <i>RMSD of redocking</i> |
|----------------|-------------------|-----------------------------|-----------------|--------------|------------------|-----------------------|--------------------------|
| Hsp90          | Ia                | 4                           | 1UY6            | A            | PU3              | 1.90                  | 0.788                    |
| Hsp90          | IIa               | 3                           | 2YKI            | A            | YKI              | 1.67                  | 1.006                    |
| Hsp90          | IIIa              | 3                           | 2XHR            | A            | C0P              | 2.2                   | 0.759                    |
| Hsp90          | IVa               | 3                           | 2BYI            | A            | 2DD              | 1.6                   | 0.123                    |
| Hsp90          | Va                | 3                           | 3OWD            | A            | MEY              | 1.63                  | 0.303                    |
| Hsp90          | VIa               | 1                           | 3RLR            | B            | 3RR              | 1.7                   | 0.115                    |
| Hsp90          | VIIa              | 4                           | 4YKW            | A            | 4ES              | 1.85                  | 0.083                    |
| Hsp90          | VIIIa             | 3                           | 2VCI            | A            | 2GJ              | 2.00                  | 0.557                    |
| Hsp90          | IXa               | 3                           | 4AWO            | A            | 99B              | 1.7                   | 1.557                    |
| Hsp90          | Xa                | 3                           | 3K99            | A            | PFT              | 2.1                   | 0.195                    |
| Hsp90          | XIa               | 3                           | 3TUH            | A            | TUH              | 1.8                   | 0.166                    |
| HDAC6          |                   | 0                           | 5EDU            | A            | TSN              | 2.79                  | 1.42                     |

**Note:** \* RMSD of redocking poses was evaluated after binding site alignment.

**Table S2. Hsp90 ligands that resulted similar to the identified compounds, according to MACCS and ECFP4 fingerprint similarity estimations.**

| <i>Compound ID</i> | <i>Number of ChEMBL ligands (actives)<sup>a</sup></i> | <i>MACCSfp score range (max - min)</i> | <i>MACCSfp mean (± St.Dev.)</i> | <i>ECFP4fp score range (max - min)</i> | <i>ECFP4fp mean (± St.Dev.)</i> |
|--------------------|-------------------------------------------------------|----------------------------------------|---------------------------------|----------------------------------------|---------------------------------|
| <b>4</b>           | 760 (666)                                             | 0.842 - 0.23                           | 0.546 ± 0.094                   | 0.593 - 0.3                            | 0.378 ± 0.057                   |
| <b>5</b>           | 632 (574)                                             | 0.721 - 0.158                          | 0.555 ± 0.078                   | 0.553 - 0.3                            | 0.367 ± 0.043                   |
| <b>8</b>           | 796 (713)                                             | 0.69 - 0.197                           | 0.475 ± 0.07                    | 0.622 - 0.3                            | 0.394 ± 0.066                   |
| <b>9</b>           | 866 (742)                                             | 0.647 - 0.179                          | 0.506 ± 0.077                   | 0.564 - 0.3                            | 0.378 ± 0.056                   |
| <b>10</b>          | 930 (812)                                             | 0.647 - 0.179                          | 0.507 ± 0.075                   | 0.575 - 0.3                            | 0.394 ± 0.062                   |

**Note:** <sup>a</sup> Ligands whose activity annotations have been reported in terms of IC<sub>50</sub>, K<sub>i</sub>, K<sub>d</sub> or EC<sub>50</sub>, and their activity values on Hsp90 are below 5 μM.
